# Supplementary material
Source: HighWire-hosted journal article supplement (https://bmjopen.bmj.com/content/10/8/e034524)
Supplement: inline-supplementary-material-1 [file inline-supplementary-material-1.pdf]

**Supplementary Table 1: Characteristics of included survey**

| Country            | Survey type | Survey year | Sample size (n) |
|--------------------|-------------|-------------|-----------------|
| <b>Afghanistan</b> | DHS         | 2015        | 32,712          |
| <b>Angola</b>      | DHS         | 2015        | 14,322          |
| <b>Bangladesh</b>  | DHS         | 1994        | 3,874           |
|                    | DHS         | 1997        | 6,189           |
|                    | DHS         | 2000        | 6,832           |
|                    | DHS         | 2004        | 6,908           |
|                    | DHS         | 2007        | 6,150           |
|                    | DHS         | 2011        | 8,753           |
|                    | DHS         | 2014        | 7,886           |
| <b>Myanmar</b>     | DHS         | 2015        | 4,815           |
| <b>Burundi</b>     | DHS         | 1987        | 3,811           |
|                    | DHS         | 2010        | 7,742           |
|                    | DHS         | 2016        | 13,192          |
| <b>Cameroon</b>    | DHS         | 1991        | 3,350           |
|                    | DHS         | 1998        | 2,317           |
|                    | DHS         | 2004        | 8,125           |
|                    | DHS         | 2011        | 11,732          |
| <b>Congo DR</b>    | DHS         | 2007        | 8,992           |
|                    | DHS         | 2013        | 18,716          |
| <b>Benin</b>       | DHS         | 1996        | 3,011           |
|                    | DHS         | 2001        | 5,349           |
|                    | DHS         | 2006        | 16,075          |
|                    | DHS         | 2011        | 13,407          |
| <b>Ethiopia</b>    | DHS         | 2000        | 10,873          |
|                    | DHS         | 2005        | 9,861           |
|                    | DHS         | 2011        | 1,164           |
|                    | DHS         | 2016        | 10,641          |

Supplementary Table 1 Contd.: Characteristics of included survey

| Country              | Survey type | Survey year | Sample size (n) |
|----------------------|-------------|-------------|-----------------|
| <b>Ghana</b>         | DHS         | 1988        | 4,136           |
|                      | DHS         | 1993        | 2,204           |
|                      | DHS         | 1998        | 3,298           |
|                      | DHS         | 2003        | 3,844           |
|                      | DHS         | 2008        | 2,992           |
|                      | DHS         | 2014        | 5,884           |
| <b>Guinea</b>        | DHS         | 1999        | 5,834           |
|                      | DHS         | 2005        | 6,364           |
|                      | DHS         | 2012        | 7,039           |
| <b>India</b>         | DHS         | 1992        | 48,959          |
|                      | DHS         | 1998        | 33,026          |
|                      | DHS         | 2005        | 51,555          |
|                      | DHS         | 2015        | 259,627         |
| <b>Cote d'ivoire</b> | DHS         | 1994        | 3,998           |
|                      | DHS         | 1998        | 1,992           |
|                      | DHS         | 2011        | 7,776           |
| <b>Kenya</b>         | DHS         | 1989        | 6,980           |
|                      | DHS         | 1993        | 6,115           |
|                      | DHS         | 1998        | 3,531           |
|                      | DHS         | 2003        | 5,949           |
|                      | DHS         | 2008        | 6,079           |
|                      | DHS         | 2014        | 20,964          |
| <b>Lesotho</b>       | DHS         | 2004        | 3,697           |
|                      | DHS         | 2009        | 3,999           |
|                      | DHS         | 2014        | 3,138           |
| <b>Madagascar</b>    | DHS         | 1992        | 5,273           |
|                      | DHS         | 1997        | 3,681           |
|                      | DHS         | 2003        | 5,415           |
|                      | DHS         | 2008        | 12,448          |

Supplementary Table 1 Contd.: Characteristics of included survey

| Country           | Survey type    | Survey year | Sample size (n) |
|-------------------|----------------|-------------|-----------------|
| <b>Malawi</b>     | DHS            | 1992        | 4,495           |
|                   | DHS            | 2000        | 11,926          |
|                   | DHS            | 2004        | 10,914          |
|                   | DHS            | 2010        | 19,967          |
|                   | DHS            | 2016        | 17,286          |
| <b>Mali</b>       | DHS            | 1987        | 3,358           |
|                   | DHS            | 1995        | 6,031           |
|                   | DHS            | 2001        | 13,097          |
|                   | DHS            | 2006        | 14,238          |
|                   | DHS            | 2012        | 10,326          |
|                   | <b>Morocco</b> | DHS         | 1987            |
| DHS               |                | 1992        | 5,197           |
| DHS               |                | 2003        | 6,180           |
| <b>Mozambique</b> | DHS            | 1997        | 4,122           |
|                   | DHS            | 2003        | 10,326          |
|                   | DHS            | 2011        | 11,102          |
| <b>Niger</b>      | DHS            | 1992        | 6,899           |
|                   | DHS            | 1998        | 4,798           |
|                   | DHS            | 2006        | 9,193           |
|                   | DHS            | 2012        | 12,558          |
| <b>Nigeria</b>    | DHS            | 1990        | 7,902           |
|                   | DHS            | 1999        | 3,552           |
|                   | DHS            | 2003        | 6,029           |
|                   | DHS            | 2008        | 28,647          |
|                   | DHS            | 2013        | 31,482          |
| <b>Pakistan</b>   | DHS            | 1991        | 6,428           |
|                   | DHS            | 2006        | 9,177           |
|                   | DHS            | 2012        | 11,763          |
| <b>Rwanda</b>     | DHS            | 1992        | 5,510           |
|                   | DHS            | 2000        | 7,922           |
|                   | DHS            | 2005        | 8,649           |
|                   | DHS            | 2010        | 9,002           |
|                   | DHS            | 2014        | 7,856           |

Supplementary Table 1 Contd.: Characteristics of included survey

| Country         | Survey type | Survey year | Sample size (n) |
|-----------------|-------------|-------------|-----------------|
| <b>Senegal</b>  |             |             |                 |
|                 | DHS         | 1986        | 4,287           |
|                 | DHS         | 1992        | 5,645           |
|                 | DHS         | 1997        | 7,372           |
|                 | DHS         | 2005        | 10,944          |
|                 | DHS         | 2010        | 12,326          |
|                 | DHS         | 2012        | 6,862           |
|                 | DHS         | 2014        | 6,842           |
|                 | DHS         | 2015        | 6,935           |
|                 | DHS         | 2016        | 6,725           |
|                 | DHS         | 2017        | 12,185          |
| <b>Zimbabwe</b> |             |             |                 |
|                 | DHS         | 1988        | 3,358           |
|                 | DHS         | 1994        | 2,438           |
|                 | DHS         | 1999        | 3,643           |
|                 | DHS         | 2005        | 5,246           |
|                 | DHS         | 2010        | 5,563           |
|                 | DHS         | 2015        | 6,132           |
| <b>Sudan</b>    |             |             |                 |
|                 | DHS         | 1989        | 6,644           |
| <b>Tunisia</b>  |             |             |                 |
|                 | DHS         | 1988        | 4,477           |
| <b>Uganda</b>   |             |             |                 |
|                 | DHS         | 1988        | 4,959           |
|                 | DHS         | 1995        | 5,756           |
|                 | DHS         | 2001        | 7,113           |
|                 | DHS         | 2006        | 8,369           |
|                 | DHS         | 2011        | 7,878           |
|                 | DHS         | 2016        | 15,522          |
| <b>Egypt</b>    |             |             |                 |
|                 | DHS         | 1988        | 8,647           |
|                 | DHS         | 1992        | 8,764           |
|                 | DHS         | 1995        | 12,135          |
|                 | DHS         | 2000        | 11,467          |
|                 | DHS         | 2005        | 13,851          |
|                 | DHS         | 2008        | 10,872          |
|                 | DHS         | 2014        | 15,848          |

**Supplementary Table 1 Contd.: Characteristics of included survey**

| Country             | Survey type | Survey year | Sample size (n)    |
|---------------------|-------------|-------------|--------------------|
| <b>Tanzania</b>     | DHS         | 1991        | 8,138              |
|                     | DHS         | 1996        | 6,789              |
|                     | DHS         | 1999        | 3,215              |
|                     | DHS         | 2004        | 8,564              |
|                     | DHS         | 2010        | 8,023              |
|                     | DHS         | 2015        | 10,233             |
| <b>Burkina Faso</b> | DHS         | 1993        | 5,828              |
|                     | DHS         | 1998        | 5,953              |
|                     | DHS         | 2003        | 10,645             |
|                     | DHS         | 2010        | 15,044             |
| <b>Yemen</b>        | DHS         | 1991        | 7,286              |
|                     | DHS         | 2013        | 16,093             |
| <b>Zambia</b>       | DHS         | 1992        | 6,299              |
|                     | DHS         | 1996        | 7,248              |
|                     | DHS         | 2001        | 6,877              |
|                     | DHS         | 2007        | 6,401              |
|                     | DHS         | 2013        | 13,457             |
| <b>Total (N)</b>    |             |             | <b>1, 520, 018</b> |
